# Supplementary material for: Global analysis of prokaryotic tRNA-derived cyclodipeptide biosynthesis
Source: BMC Genomics. 2018 Jan 15;19:45. doi: 10.1186/s12864-018-4435-1 (PMC5767969; doi:10.1186/s12864-018-4435-1)
Supplement: Additional file 1: Table S1. — Hidden Markov models developed for this study, and their bit score cutoffs and associated tailoring reactions. (XLSX 41 kb) [file 12864_2018_4435_MOESM1_ESM.xlsx]

## Sheet: Table_S1.csv
HMM	Full name	Abbreviation	Cutoff	Tailoring reaction
CDPS.hmm	Cyclodipeptide synthase	CDPS	40
CDPS_NYH.hmm	NYH family	CDPS
CDPS_XYP.hmm	XYP family	CDPS
CDPS_SYQ.hmm	SYQ family	CDPS
AlbA.hmm	Cyclic dipeptide oxidase, subunit A	CDO<sub>A</sub>	160	AlbA
AlbB.hmm	Cyclic dipeptide oxidase, subunit B	CDO<sub>B</sub>	70	AlbA
Amir_4628.hmm	Amide N-methyltransferase	NMT	225	Amir4628
CypX.hmm	Diketopiperazine ring oxidase	P450	600	CypX
CYP121.hmm	Aryl C-C bond forming oxidase	P450	350	CYP121
Ndas_1145.hmm	Amide O-/N-methyltransferase	MT	225	Ndas1145
Ndas_1149.hmm	Side chain O-methyltransferase	OMT	350	Ndas1149
